# Supplementary material for: Structural Characterization and Anticoagulant Activities of a Keratan Sulfate-like Polysaccharide from the Sea Cucumber Holothuria fuscopunctata
Source: MDPI journal article supplement (doi:10.3390/md21120632), 2023-12-08
Supplement: s1 [file s1]

# Structural Characterization and Anticoagulant Activities of a Keratan Sulfate-like Polysaccharide from the Sea Cucumber *Holothuria fuscopunctata*

Ru Chen <sup>1,2,3</sup>, Weili Wang <sup>1,3</sup>, Ronghua Yin <sup>4</sup>, Ying Pan <sup>4</sup>, Chen Xu <sup>4</sup>, Na Gao <sup>4\*</sup>, Xiaodong Luo <sup>1,5\*</sup>, Jinhua Zhao <sup>1,4\*</sup>

1. State Key Laboratory of Phytochemistry and Plant Resources in West China, Kunming Institute of Botany, Chinese Academy of Sciences, Kunming 650201, China
2. Yunnan Institute of Traditional Chinese Medicine and Materia Medica, Kunming 650223, China
3. University of Chinese Academy of Sciences, Beijing 100049, China
4. School of Pharmaceutical Sciences, South-Central Minzu University, Wuhan 430074, China
5. Yunnan Characteristic Plant Extraction Laboratory, Key Laboratory of Medicinal Chemistry for Natural Resource, Ministry of Education and Yunnan Province, School of Chemical Science and Technology, Yunnan University, Kunming 650091, China

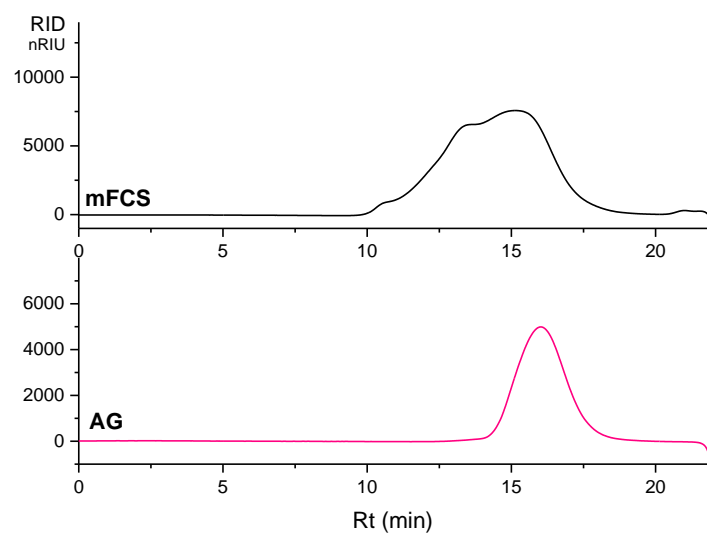

**Figure S1.** HPGPC profiles of mFCS and AG

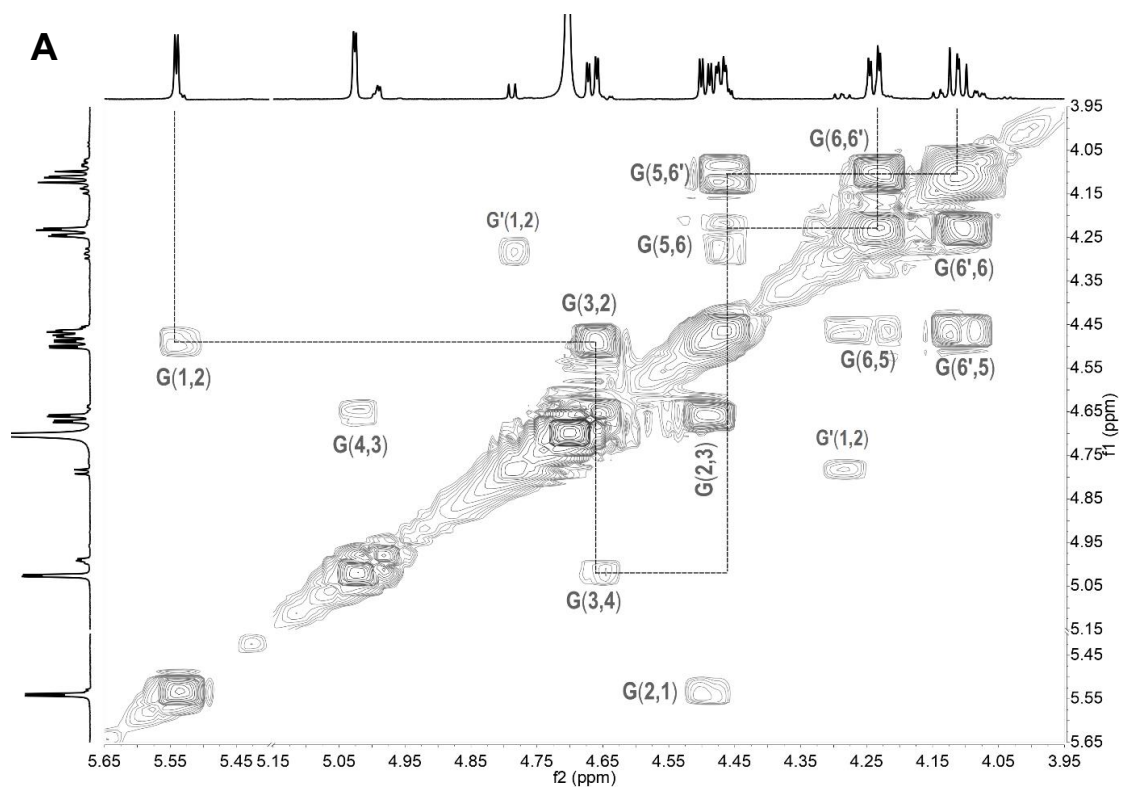



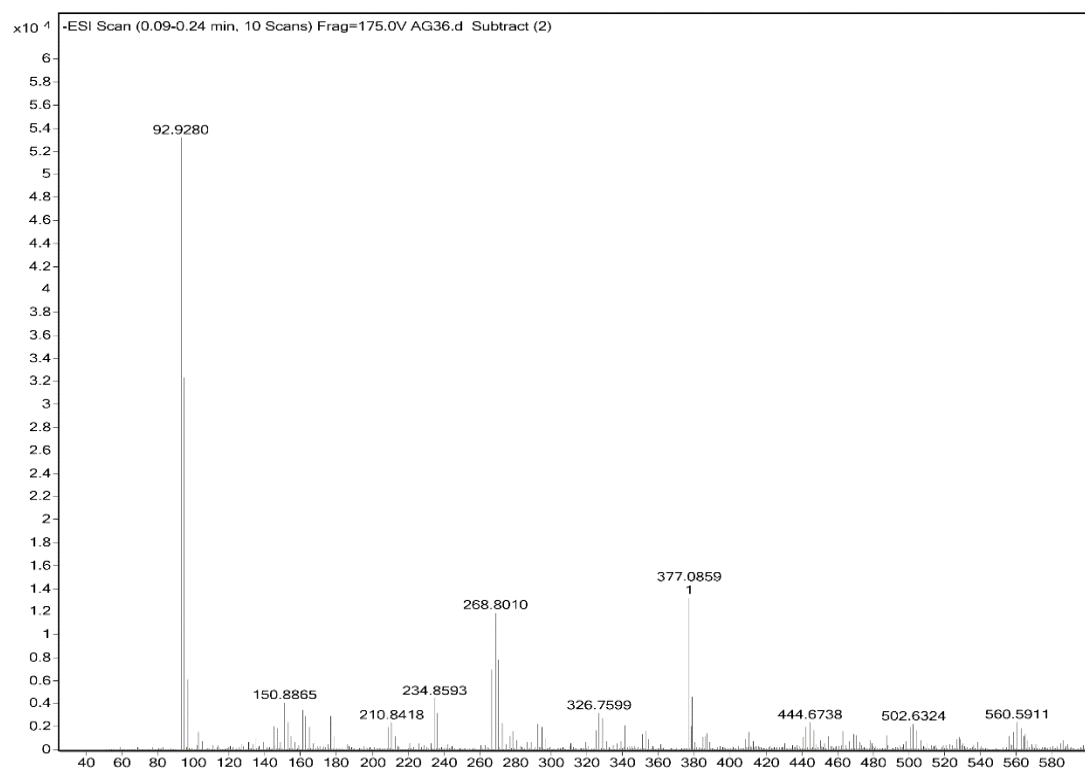

Figure S3. ESI-Q-TOF MS of oAG-1

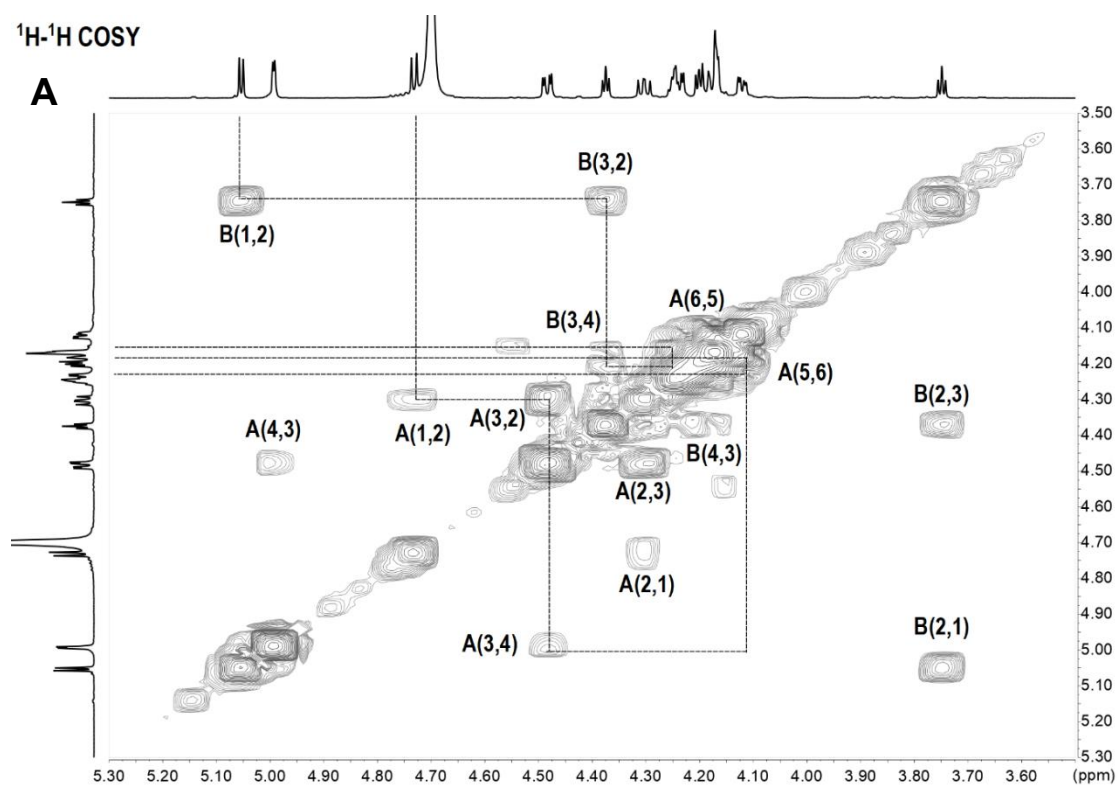

<sup>1</sup>H-<sup>1</sup>H TOCSY

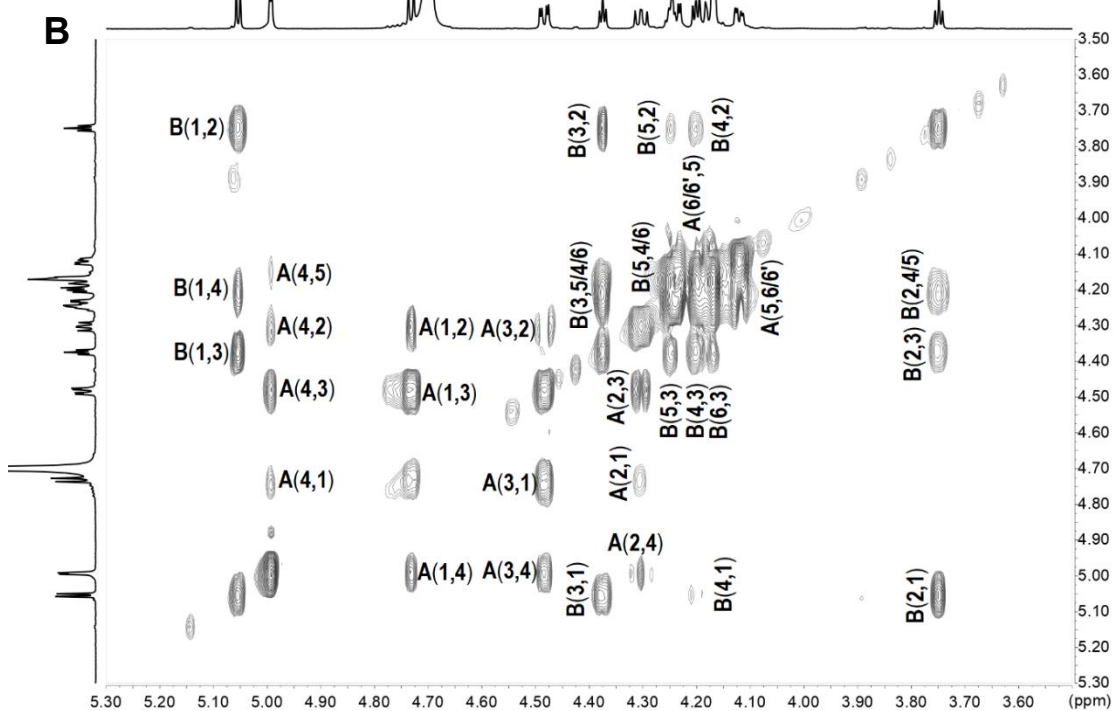

<sup>1</sup>H-<sup>1</sup>H ROESY

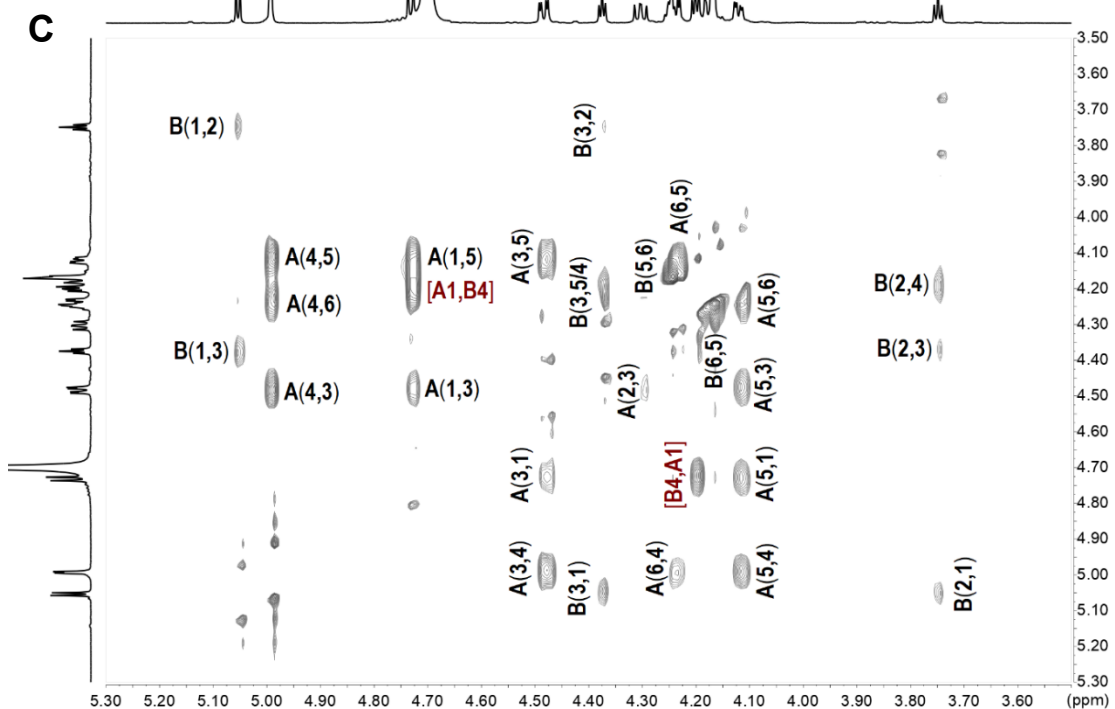

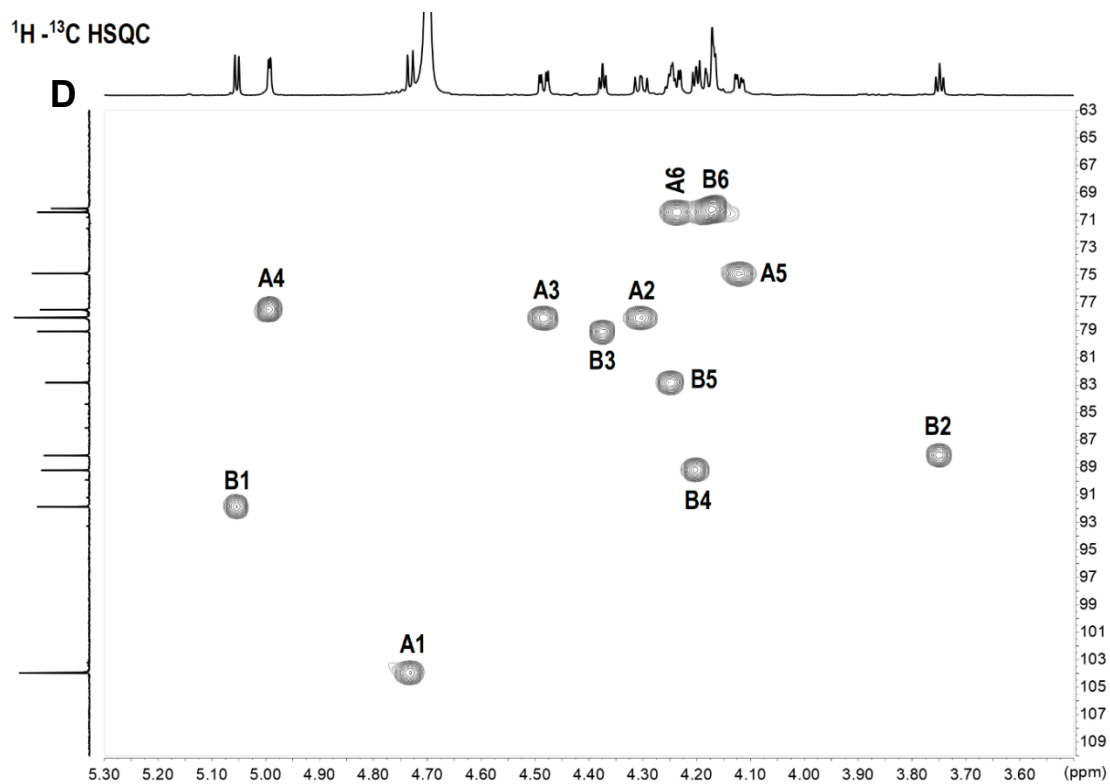

**Figure S4.**  $^1\text{H}$ - $^1\text{H}$  COSY (A),  $^1\text{H}$ - $^1\text{H}$  TOCSY (B),  $^1\text{H}$ - $^1\text{H}$  ROESY (C) and  $^1\text{H}$ - $^{13}\text{C}$  HSQC (D)

spectra of oAG-3

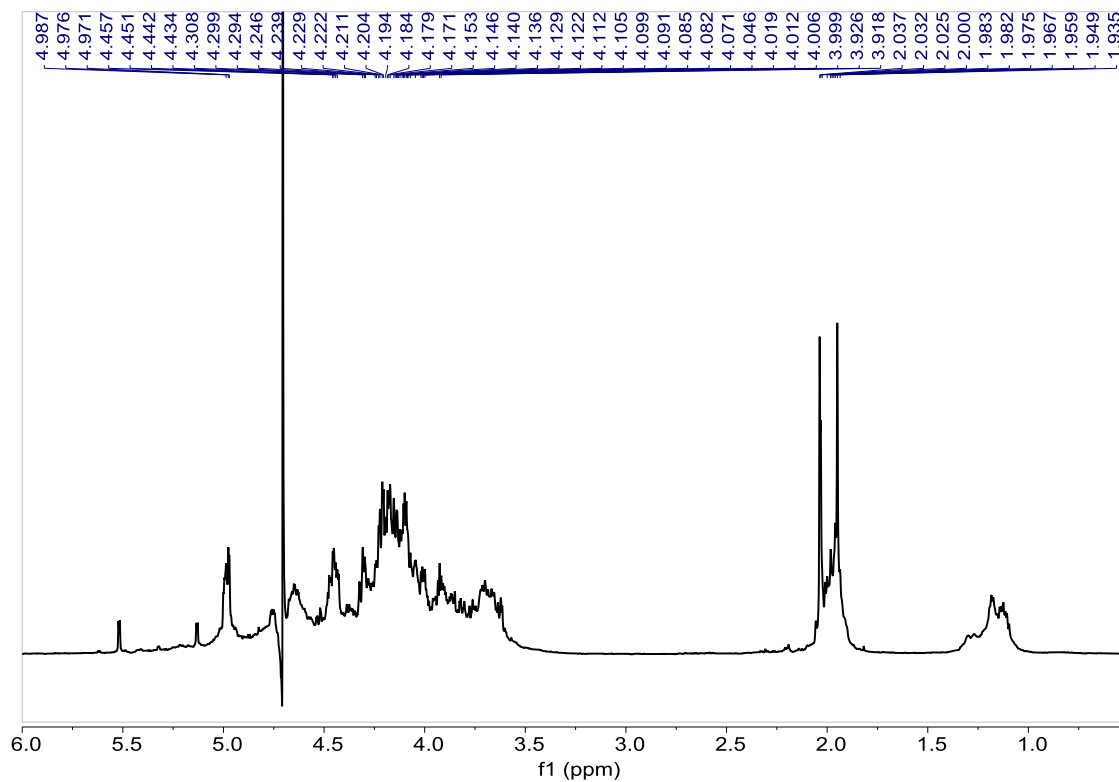

**Figure S5.**  $^1\text{H}$  NMR spectrum of dAG9

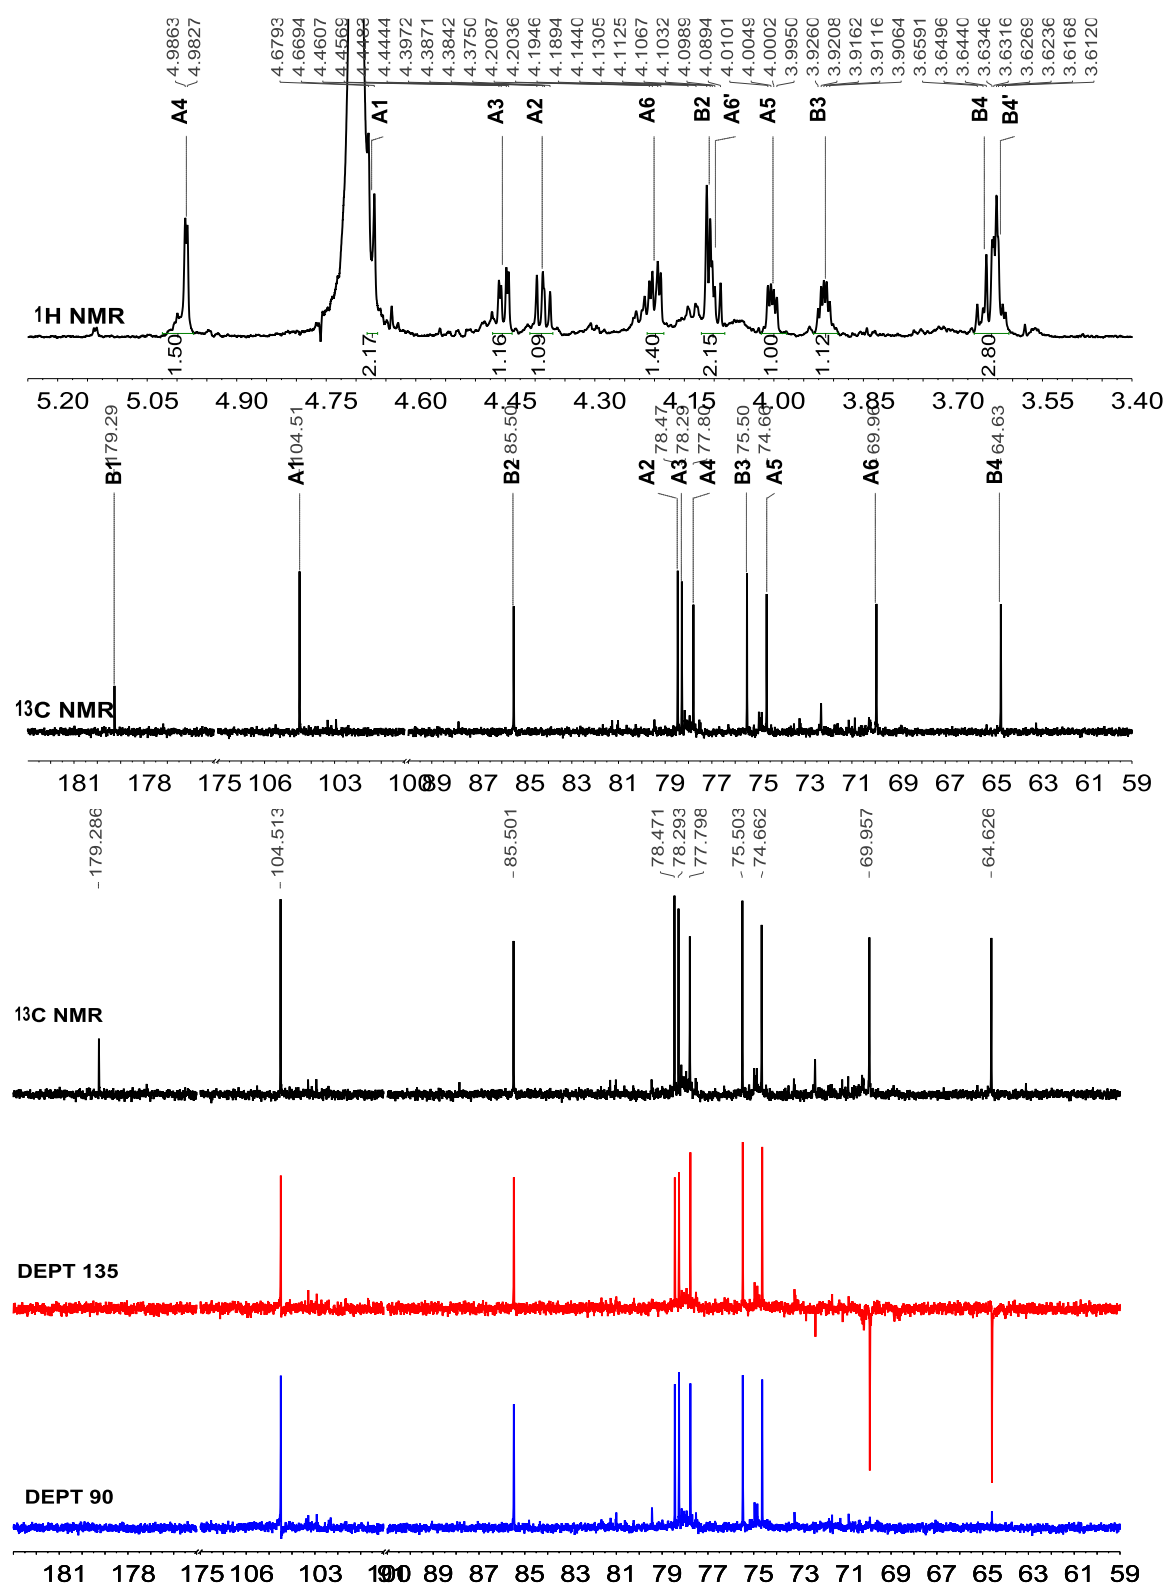

Figure S6.  $^1\text{H}$  /  $^{13}\text{C}$  NMR spectra of the oligosaccharide oAG-4

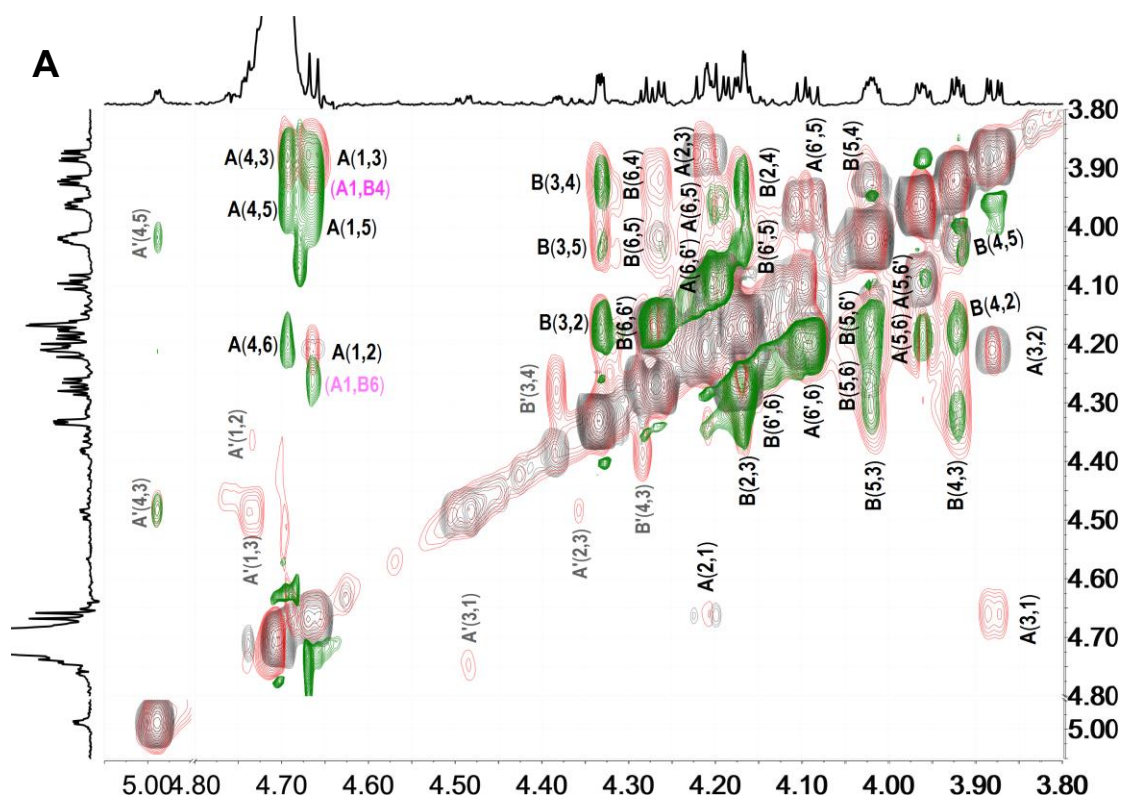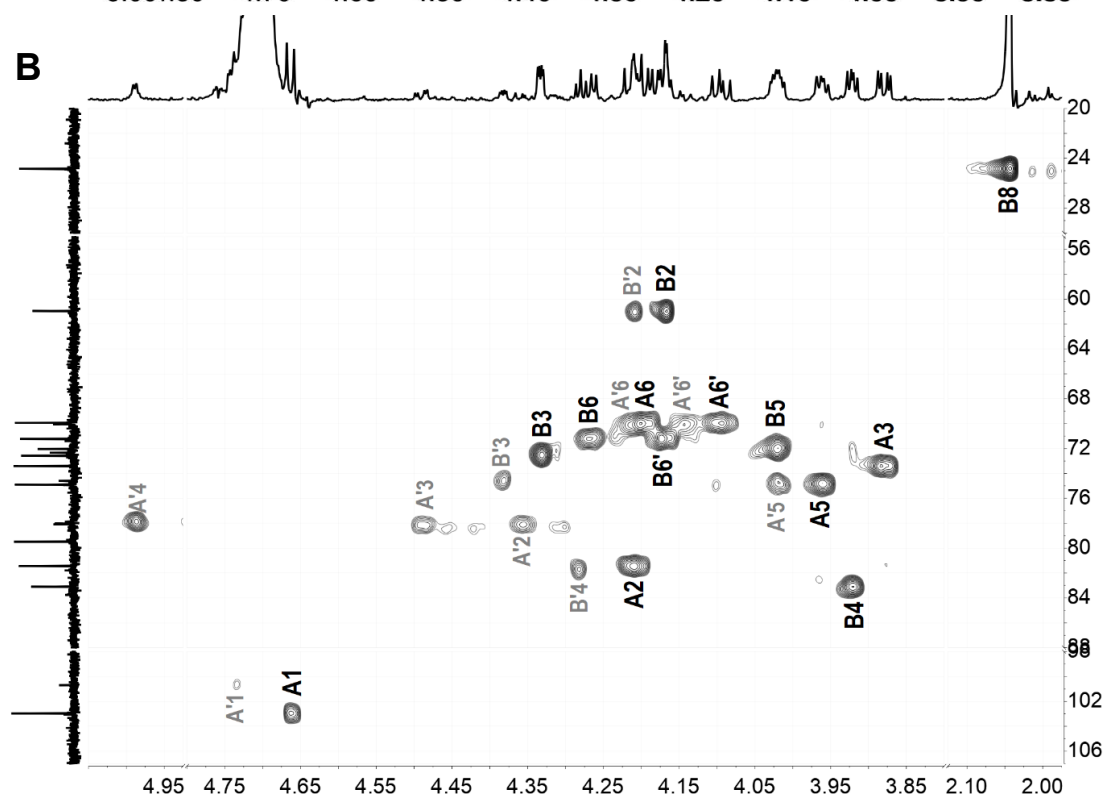



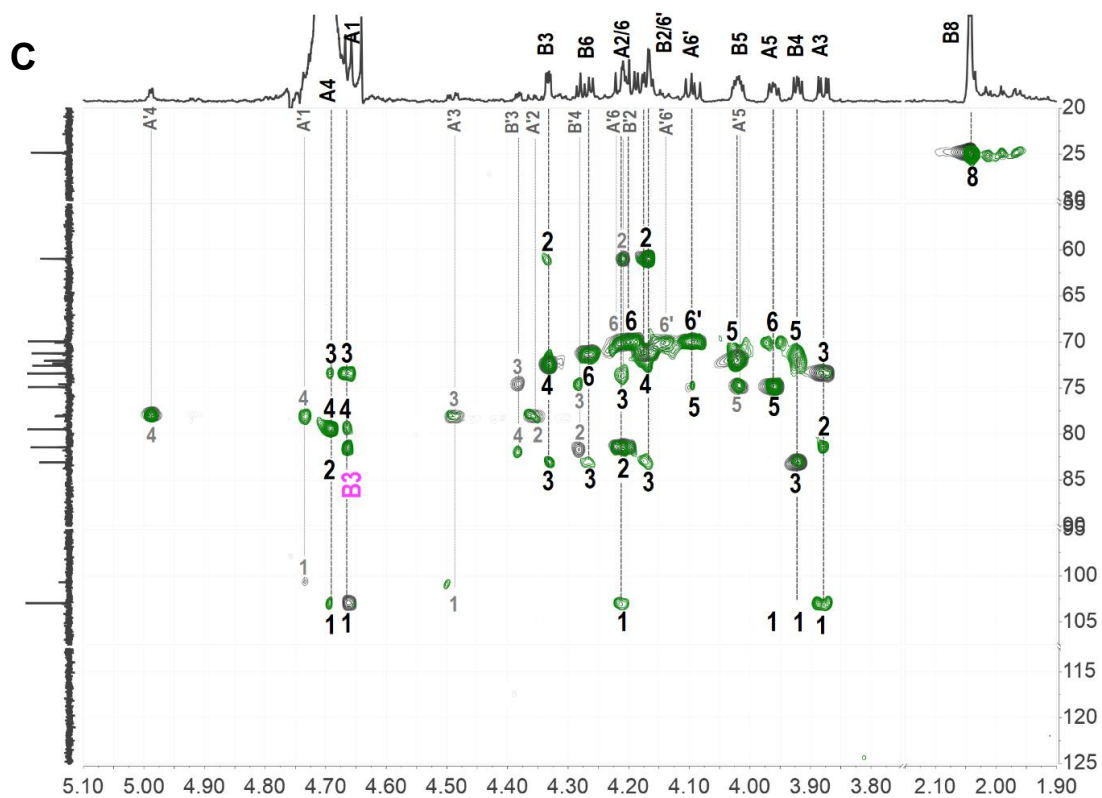

**Figure S7.** Overlapped  $^1\text{H}$ - $^1\text{H}$  COSY (gray), TOCSY (red), ROESY (green) spectra (A),  $^1\text{H}$ - $^{13}\text{C}$  HSQC (B),  $^1\text{H}$ - $^{13}\text{C}$  HSQC (black)/HSQC-TOCSY (green) spectra of oAG-5 (C)

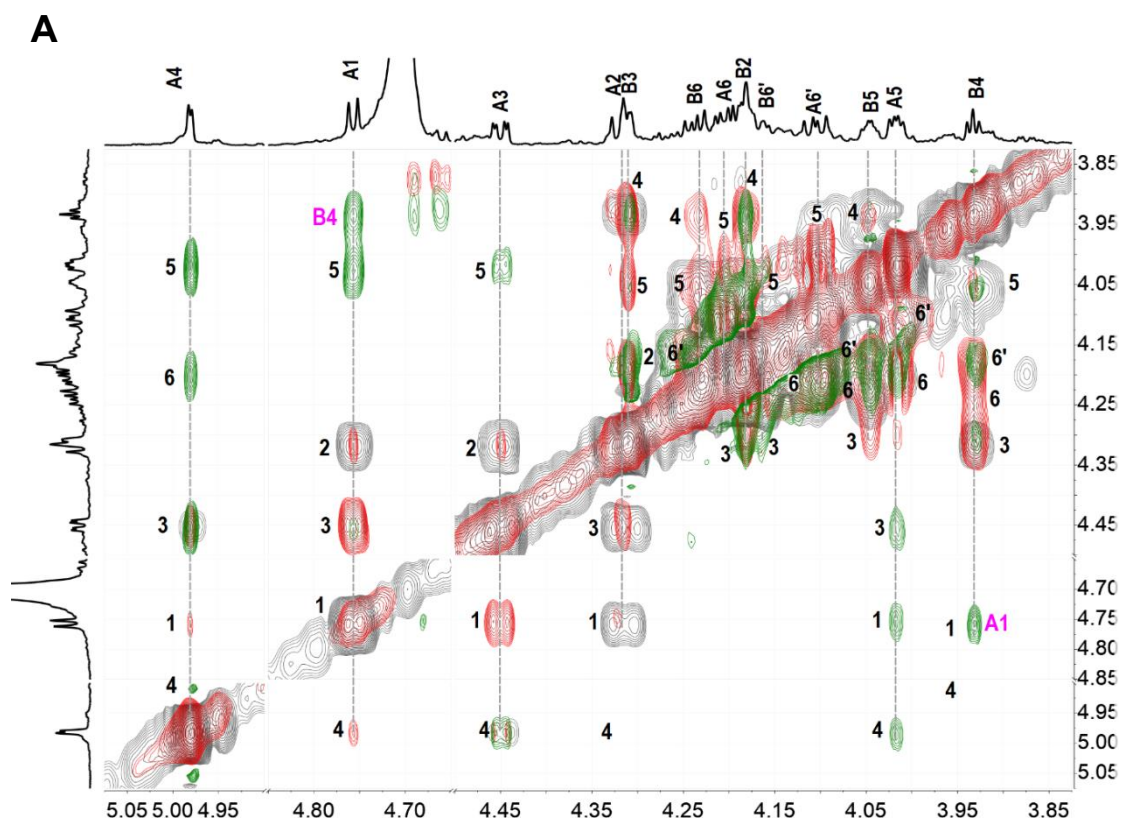

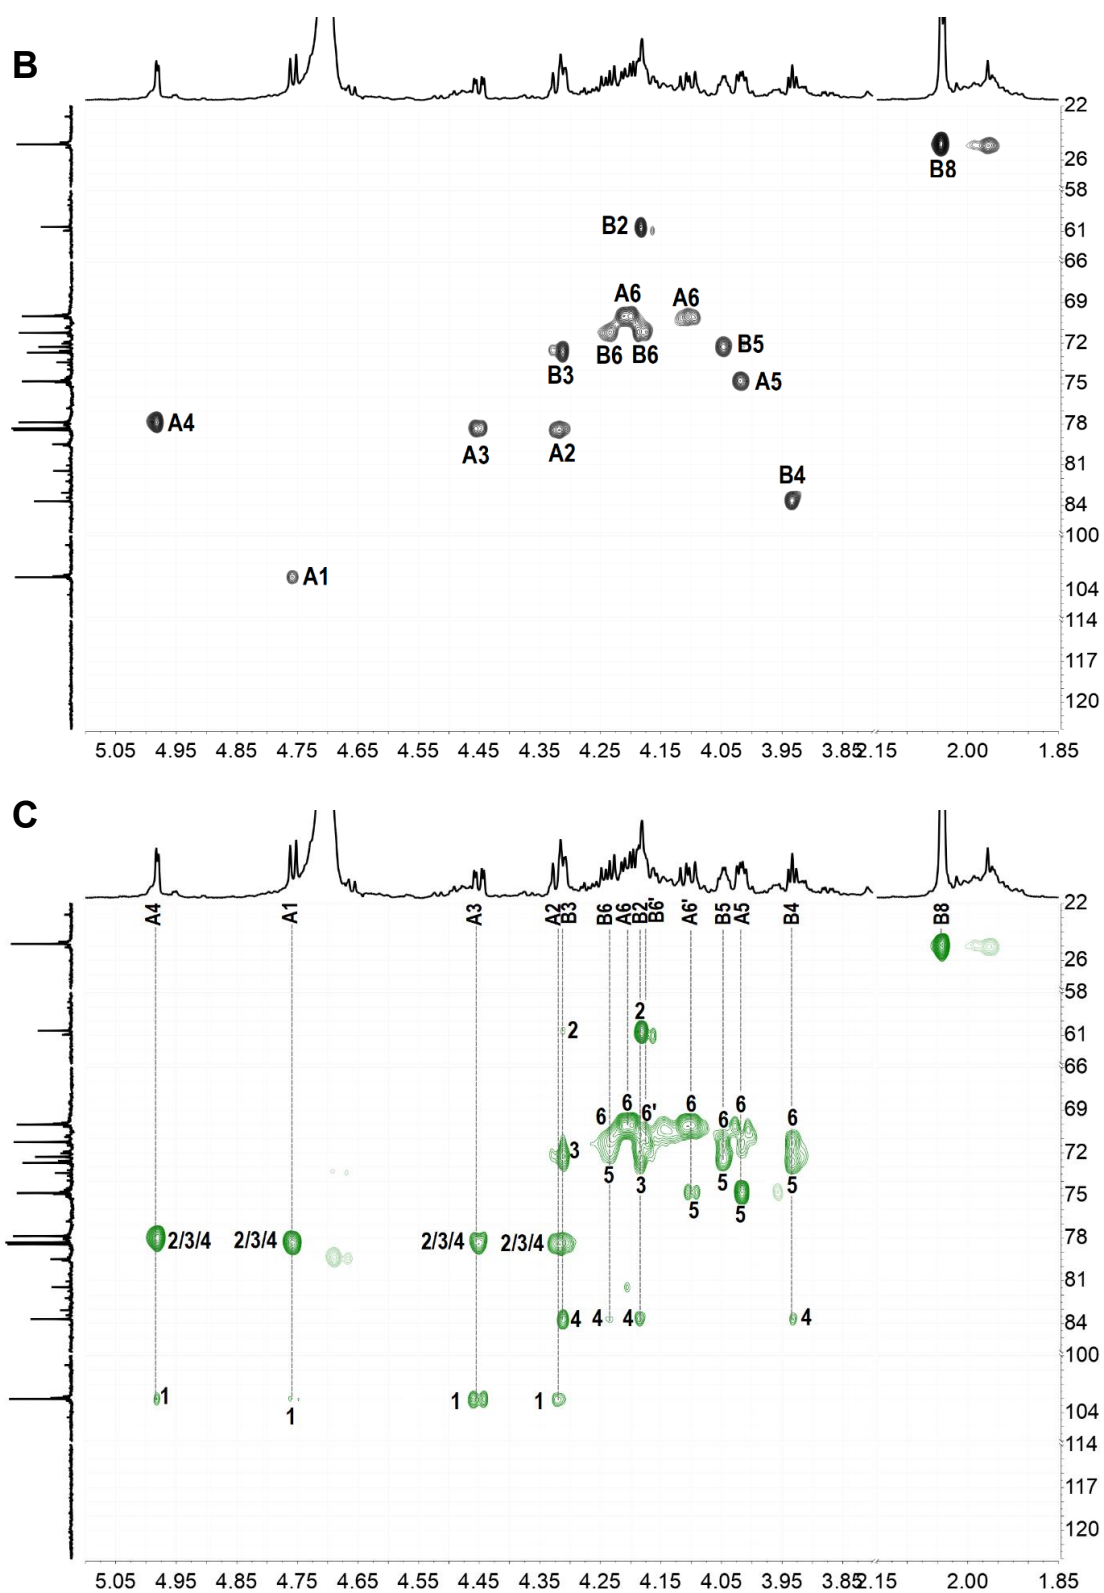

**Figure S8.** Overlapped  $^1\text{H}$ - $^1\text{H}$  COSY (gray), TOCSY (red), ROESY (green) spectra of oAG-6 (A),  $^1\text{H}$ - $^{13}\text{C}$  HSQC spectrum of oAG-6 (B) and HSQC-TOCSY spectrum of oAG-6 (C)

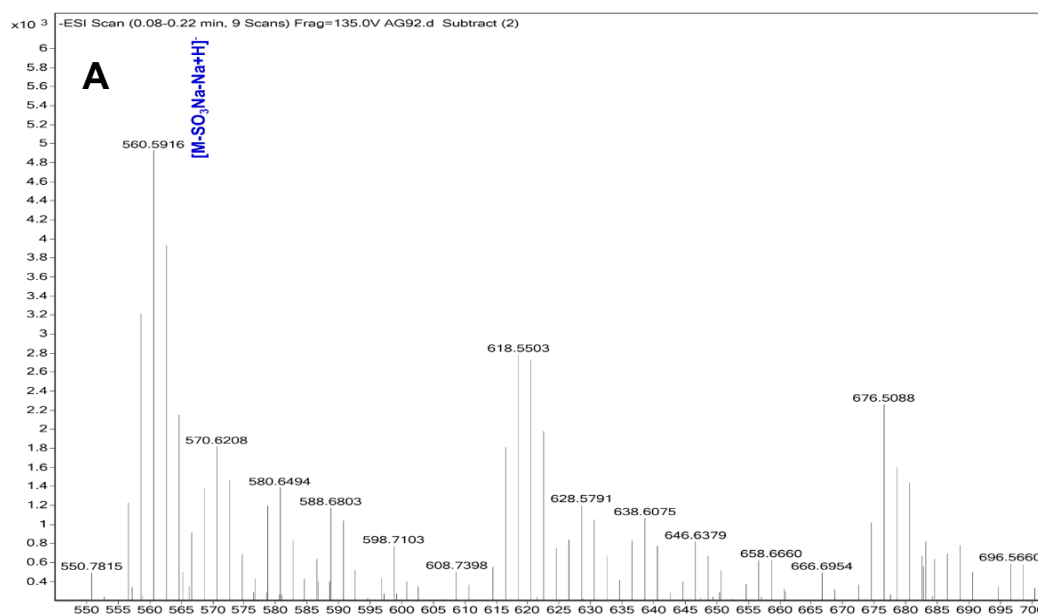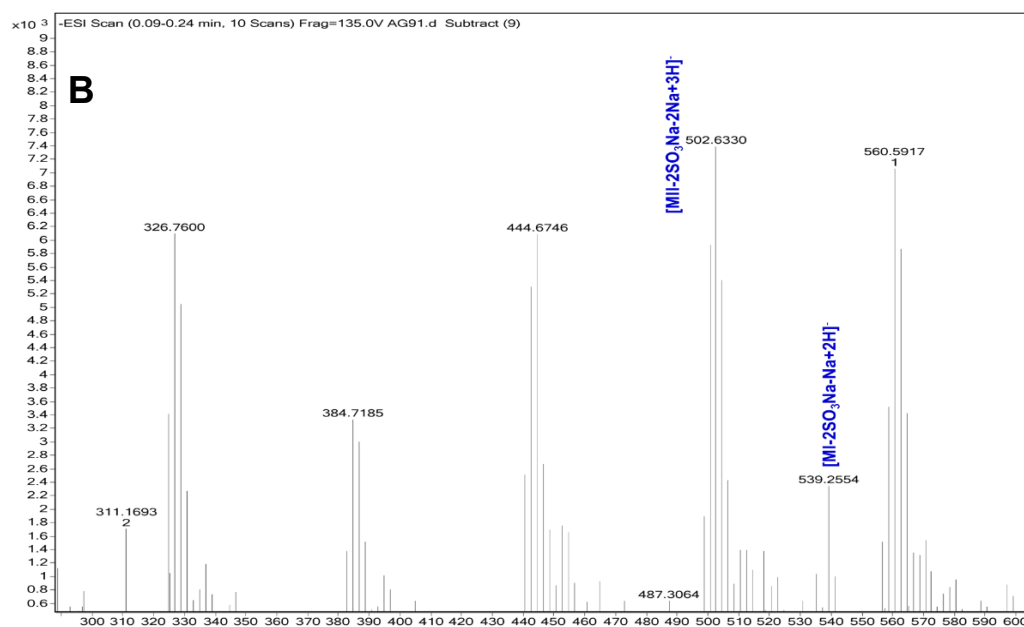

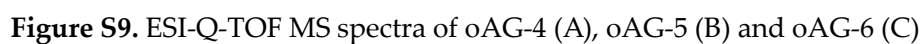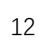

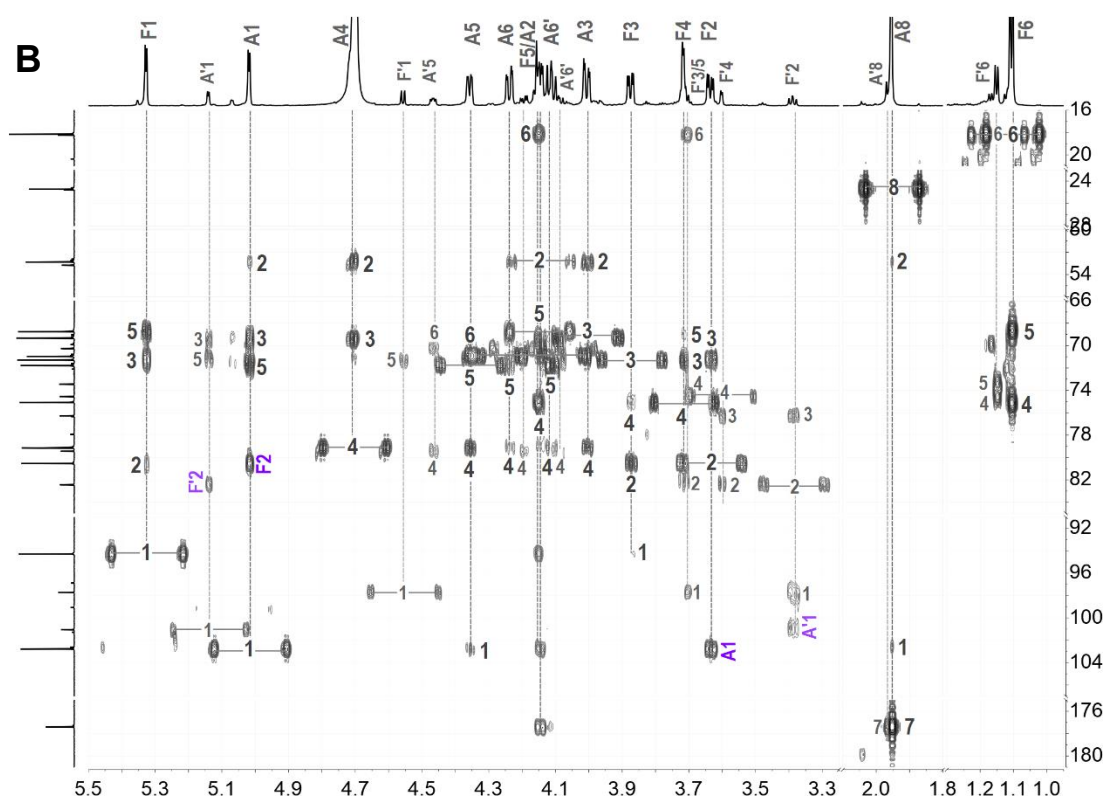

Figure S10.  $^1\text{H}$ - $^{13}\text{C}$  HSQC (A) and HMBC (B) spectra of bAG-1

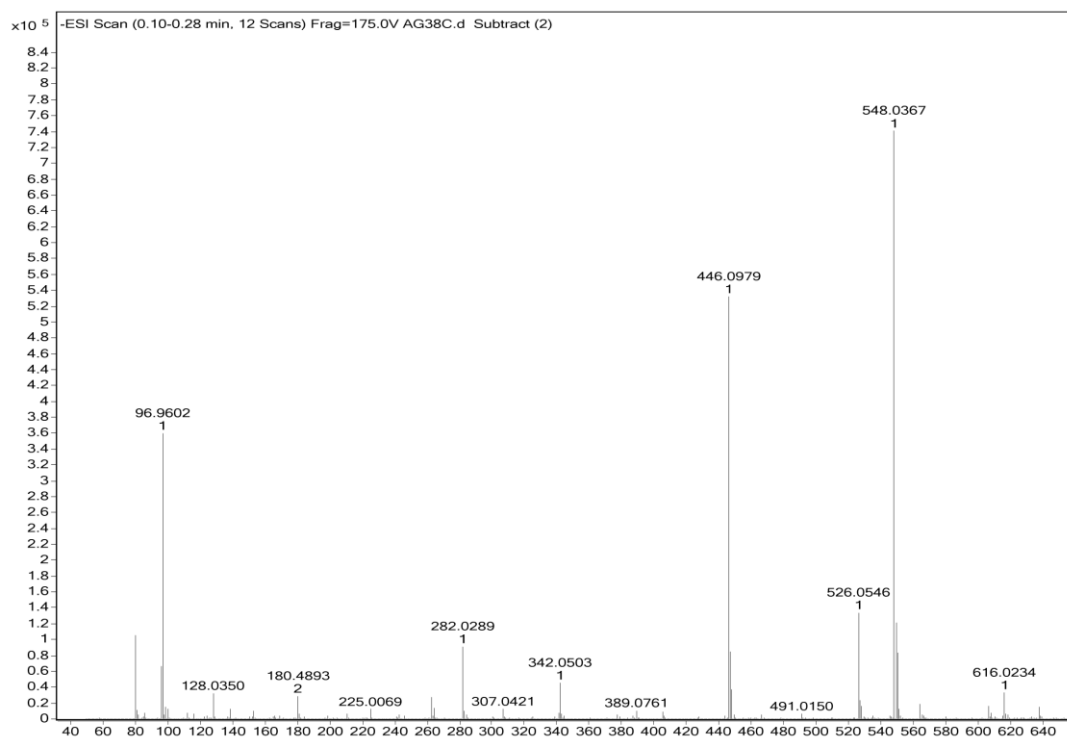

Figure S11. ESI-Q-TOF MS of bAG-1

**Table S1**  $^1\text{H}$  and  $^{13}\text{C}$  chemical shifts of oAG-1

| <sup>1</sup> H                | δ (ppm) | Coupling                    | COSY              | TOCSY             | ROESY                     | <sup>13</sup> C | δ (ppm) | HSQC | HMBC                  |
|-------------------------------|---------|-----------------------------|-------------------|-------------------|---------------------------|-----------------|---------|------|-----------------------|
| G, α-D-Gal <sub>3S4S6S</sub>  |         |                             |                   |                   |                           |                 |         |      |                       |
| H1                            | 5.541   | J <sub>(1,2)</sub> = 3.68   | H2                | H2,3,4            | H2,4,5                    | C1              | 96.05   | H1   | H1                    |
| H2                            | 4.494   | J <sub>(2,3)</sub> = 10.40  | H1,3              | H1,3,4            | H1,3,4                    | C2              | 78.14   | H2   | H2,3,4                |
| H3                            | 4.666   | J <sub>(3,4)</sub> = 3.04   | H2,4              | H1,2,4            | H2,4,5,6 <sub>b</sub>     | C3              | 77.53   | H3   | H1,2,3,4,5            |
| H4                            | 5.026   | J <sub>(4,5)</sub> = --     | H3                | H1,2,3            | H1,2,3,5,6 <sub>a/b</sub> | C4              | 81.35   | H4   | H4                    |
| H5                            | 4.471   | J <sub>(5,6)</sub> = 3.20   | H6 <sub>a/b</sub> | H6 <sub>a/b</sub> | H1,3,4,6 <sub>a/b</sub>   | C5              | 73.42   | H5   | H1,5,6 <sub>a/b</sub> |
| H6a                           | 4.238   | J <sub>(6,6')</sub> = 11.28 | H5,6 <sub>b</sub> | H5,6 <sub>b</sub> | H4,5,6 <sub>b</sub>       | C6              | 73.34   | H6   | H6 <sub>a/b</sub>     |
| H6b                           | 4.111   | J <sub>(5,6')</sub> = 8.96  | H5,6 <sub>a</sub> | H5,6 <sub>a</sub> | H5,6 <sub>a</sub>         |                 |         | H6'  |                       |
| G', β-D-Gal <sub>3S4S6S</sub> |         |                             |                   |                   |                           |                 |         |      |                       |
| H1                            | 4.788   | J <sub>(1,2)</sub> = 7.80   | H2                | H2,3,4            | H3,5                      | C1              | 100.54  | H1   | /                     |
| H2                            | 4.286   | J <sub>(2,3)</sub> = 10.00  | H1,3              | H1,3              | H3                        | C2              | 82.02   | H2   | /                     |
| H3                            | 4.463   | J <sub>(3,4)</sub> = 3.28   | H2,4              | H1,2,4            | H1,4,6 <sub>b</sub>       | C3              | 80.96   | H3   | /                     |
| H4                            | 4.990   | J <sub>(4,5)</sub> = --     | H3                | H1,3              | H3,5,6 <sub>a</sub>       | C4              | 80.52   | H4   | /                     |
| H5                            | 4.079   | J <sub>(5,6)</sub> = 3.16   | H6 <sub>a/b</sub> | H6 <sub>a/b</sub> | H1,3,4,6 <sub>a</sub>     | C5              | 77.72   | H5   | /                     |
| H6a                           | 4.227   | J <sub>(6,6')</sub> = 11.20 | H5,6 <sub>b</sub> | H5,6 <sub>b</sub> | H5,6 <sub>b</sub>         | C6              | 73.26   | H6   | /                     |
| H6b                           | 4.136   | J <sub>(5,6')</sub> = 8.68  | H5,6 <sub>a</sub> | H5,6 <sub>a</sub> | H6 <sub>a</sub>           |                 |         | H6'  |                       |

**Table S2**  $^1\text{H}/^{13}\text{C}$  chemical shifts of the oligosaccharides oAG-4, oAG-5, and oAG-6

| oAG-4                                |                |    |        | oAG-5-I                                |                |    |        | oAG-5-II                                  |       |    |        | oAG-6                                    |                |    |        |
|--------------------------------------|----------------|----|--------|----------------------------------------|----------------|----|--------|-------------------------------------------|-------|----|--------|------------------------------------------|----------------|----|--------|
| A $\beta$ -D-Gal <sub>4S6S</sub> -1, |                |    |        | A $\beta$ -D-Gal <sub>3S4S6S</sub> -1, |                |    |        | A' $\beta$ -D-Gal <sub>2S3S4S6S</sub> -1, |       |    |        | A $\beta$ -D-Gal <sub>2S3S4S6S</sub> -1, |                |    |        |
| H1                                   | 4.675          | C1 | 104.51 | H1                                     | 4.663          | C1 | 102.96 | H1                                        | 4.732 | C1 | 100.69 | H1                                       | 4.757          | C1 | 103.04 |
| H2                                   | 4.386          | C2 | 78.47  | H2                                     | 4.211          | C2 | 81.44  | H2                                        | 4.355 | C2 | 78.03  | H2                                       | 4.323          | C2 | 78.43  |
| H3                                   | 4.453          | C3 | 78.29  | H3                                     | 3.880          | C3 | 73.41  | H3                                        | 4.491 | C3 | 78.08  | H3                                       | 4.450          | C3 | 78.30  |
| H4                                   | 4.984          | C4 | 77.80  | H4                                     | 4.691          | C4 | 79.48  | H4                                        | 4.989 | C4 | 77.88  | H4                                       | 4.981          | C4 | 77.86  |
| H5                                   | 4.003          | C5 | 74.66  | H5                                     | 3.960          | C5 | 74.90  | H5                                        | 4.017 | C5 | 74.87  | H5                                       | 4.017          | C5 | 74.83  |
| H6                                   | 4.199          | C6 | 69.96  | H6                                     | 4.196          | C6 | 69.94  | H6                                        | 4.226 | C6 | 70.06  | H6                                       | 4.206          | C6 | 71.24  |
| H6'                                  | 4.102          |    |        | H6'                                    | 4.095          |    |        | H6'                                       | 4.146 |    |        | H6'                                      | 4.106          |    |        |
| B -2-D-2,3,4-trihydroxybutyric acid  |                |    |        | B -4-D-GlcUANAc <sub>6S</sub>          |                |    |        | B -4-D-GlcUANAc                           |       |    |        | B -4-D-GlcUANAc <sub>6S</sub>            |                |    |        |
| H1                                   | /              | C1 | 179.30 | H1                                     | /              | C1 | 179.94 | H1                                        | /     | C1 | 179.50 | H1                                       | /              | C1 | 179.72 |
| H2                                   | 4.109          | C2 | 85.50  | H2                                     | 4.168          | C2 | 60.96  | H2                                        | 4.208 | C2 | 60.96  | H2                                       | 4.182          | C2 | 60.68  |
| H3                                   | 3.916<br>3.648 | C3 | 75.50  | H3                                     | 4.333          | C3 | 72.57  | H3                                        | 4.383 | C3 | 74.59  | H3                                       | 4.312          | C3 | 72.71  |
| H4                                   | 3.620          | C4 | 64.63  | H4                                     | 3.921          | C4 | 83.10  | H4                                        | 4.283 | C4 | 81.79  | H4                                       | 3.933          | C4 | 83.69  |
|                                      |                |    |        | H5                                     | 4.020          | C5 | 72.03  | H5                                        | /     | C5 | 178.51 | H5                                       | 4.046          | C5 | 72.28  |
|                                      |                |    |        | H6/6'                                  | 4.269<br>4.170 | C6 | 71.23  | H6                                        | /     | C6 | 176.54 | H6/6'                                    | 4.238<br>4.181 | C6 | 70.01  |
|                                      |                |    |        |                                        |                | C7 | 176.30 | H7                                        | 2.545 | C7 | 24.87  |                                          |                |    | 176.41 |
|                                      |                |    |        | H8                                     | 2.042          | C8 | 24.84  |                                           |       |    |        | H8                                       | 3.045          |    | 24.85  |
